# Supplementary material for: Detection of Mercury Ion with High Sensitivity and Selectivity Using a DNA/Graphene Oxide Hybrid Immobilized on Glass Slides
Source: MDPI journal article supplement (doi:10.3390/bios11090300), 2021-08-27
Supplement: s1 [file s1]

Supporting Information

**Detection of Mercury Ion with High Sensitivity and Selectivity Using DNA/Graphene Oxide Hybrid Immobilized on Glass Slides**

Li Gao <sup>1,\*</sup>, Qiuxiang Lv <sup>1</sup>, Ni Xia <sup>1</sup>, Yuanwei Lin <sup>1</sup>, Feng Lin <sup>2</sup> and Bangxing Han <sup>3,\*</sup>

<sup>1</sup> School of Life Sciences, Jiangsu University, Zhenjiang 212013, China; 2211917020@stmail.ujs.edu.cn (Q.L.); 18352864165@163.com (N.X.); yu-anweilin@pku.edu.cn (Y.L.)

<sup>2</sup> Key Laboratory of Healthy Freshwater Aquaculture, Ministry of Agriculture, Zhejiang Institute of Freshwater Fisheries, Huzhou 313001, China; [wwlinfeng@163.com](mailto:wwlinfeng@163.com)

<sup>3</sup> College of Biological and Pharmaceutical Engineering, West Anhui University, Moon Island, Lu'an 237012, China

\* Correspondence: [gaoli@ujs.edu.cn](mailto:gaoli@ujs.edu.cn) (L.G.); [hanbx1978@sina.com](mailto:hanbx1978@sina.com) (B.H.)

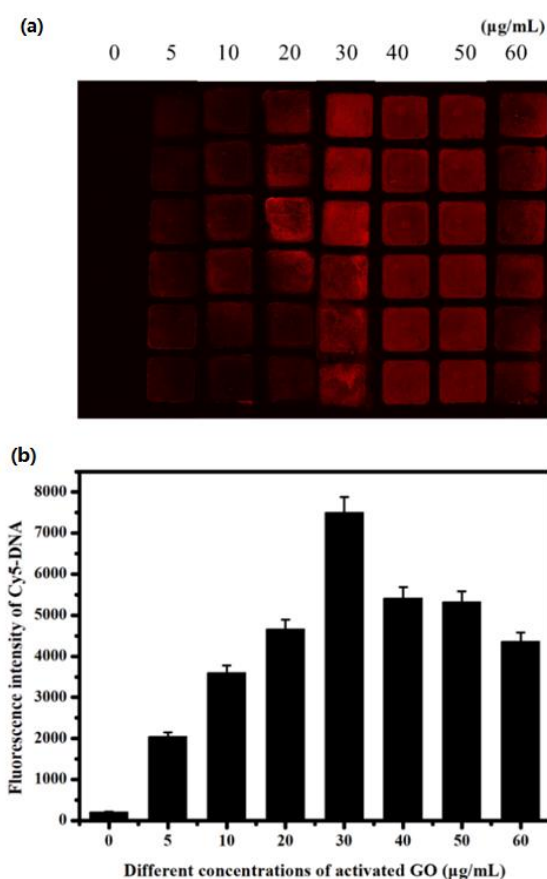

**Figure S1** Optimization of activated GO concentration based on sensors containing DNA sequences I hybrid with two PS cutting sites. (a) Scanning image of the chip microarray after optimization of activated GO concentration; (b) The fluorescence intensity of the Cy 5-DNA in the presence of different concentrations of activated GO.

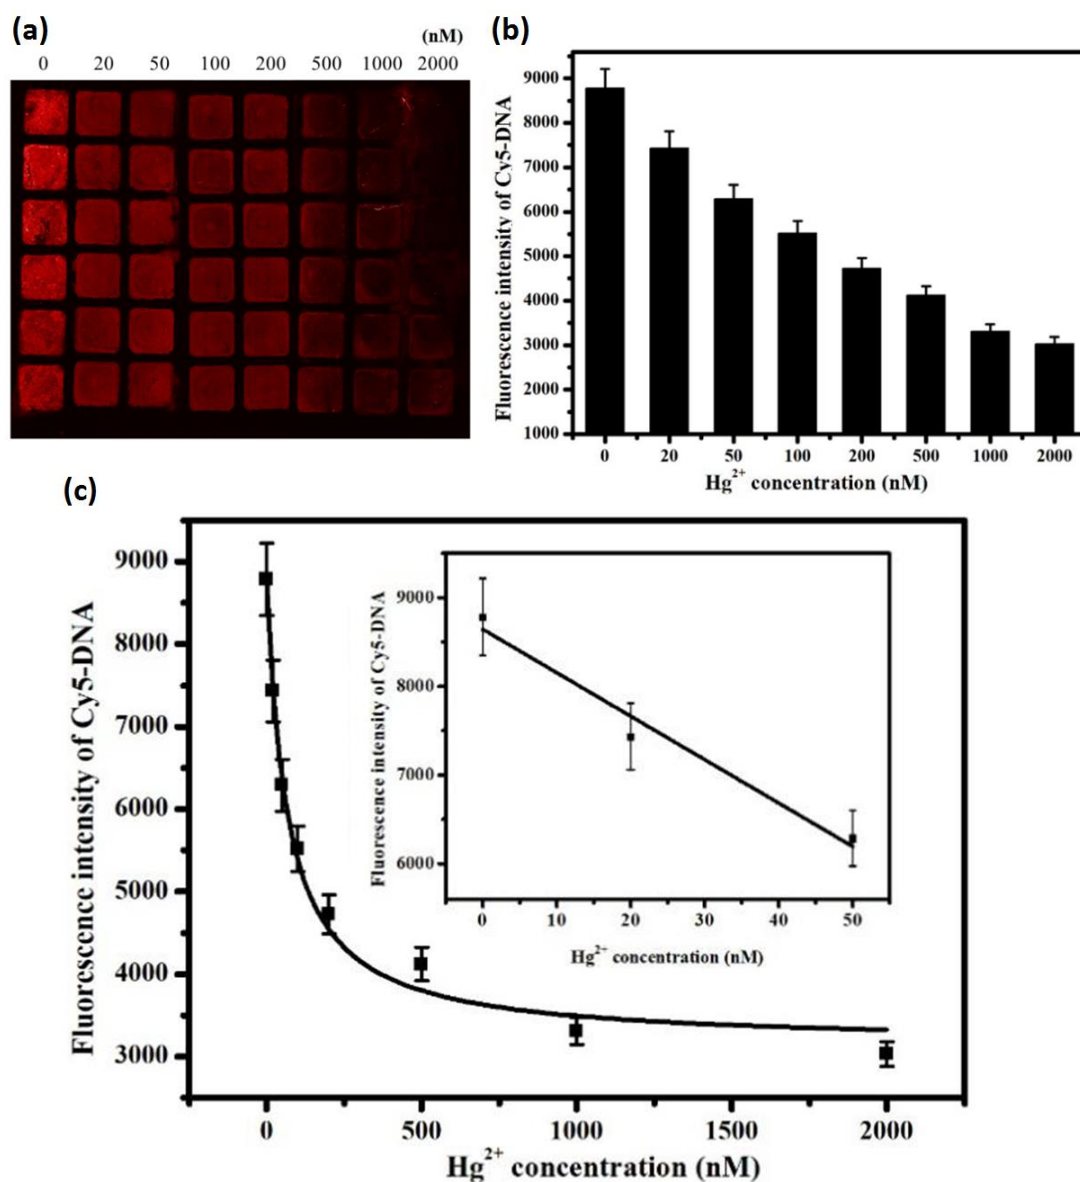

**Figure S2** Sensitivity analysis for  $\text{Hg}^{2+}$  detection based on sensors containing DNA sequences I hybrid with two PS cutting sites. **(a)** Scanning image of the chip array after adding different concentrations of  $\text{Hg}^{2+}$ ; **(b)** The fluorescence intensity of the Cy 5-DNA in the presence of different concentrations of  $\text{Hg}^{2+}$ ; **(c)** Plotted data extracted from (b). The inset shown in (c) represents the linear working curve with the average of 3 experiments at low mercury ion concentrations.

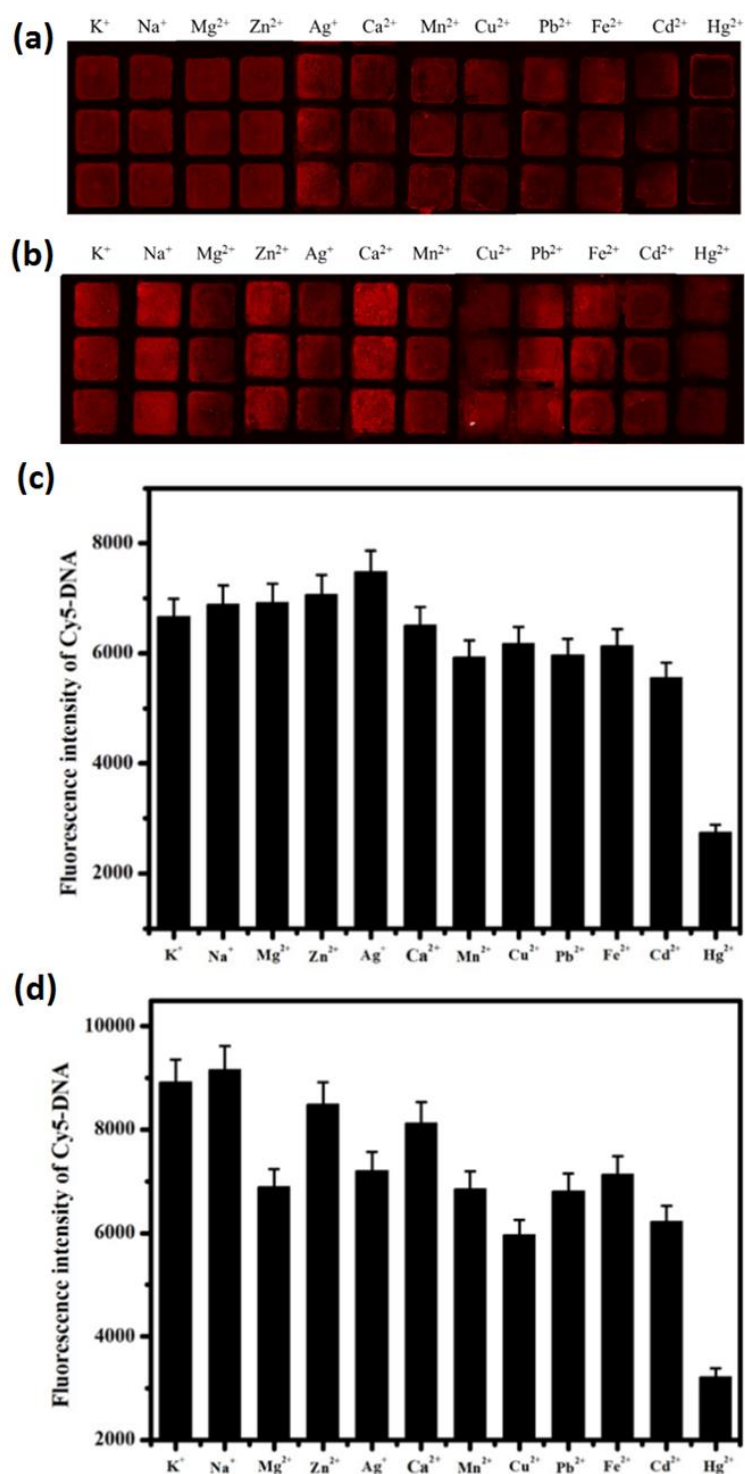

**Figure S3** Selectivity analysis for  $\text{Hg}^{2+}$  detection based on sensors containing DNA sequences I. Scanning images of the chip microarrays after adding various metal ions: (a) hybrid with one PS cutting site; (b) hybrid with two PS cutting sites. The fluorescence intensity of the Cy 5-DNA in the presence of different metal ions: (c) hybrid with one PS cutting site; (d) hybrid with two PS cutting sites. Each concentration of the metal ion was fixed at  $1\mu\text{M}$ .



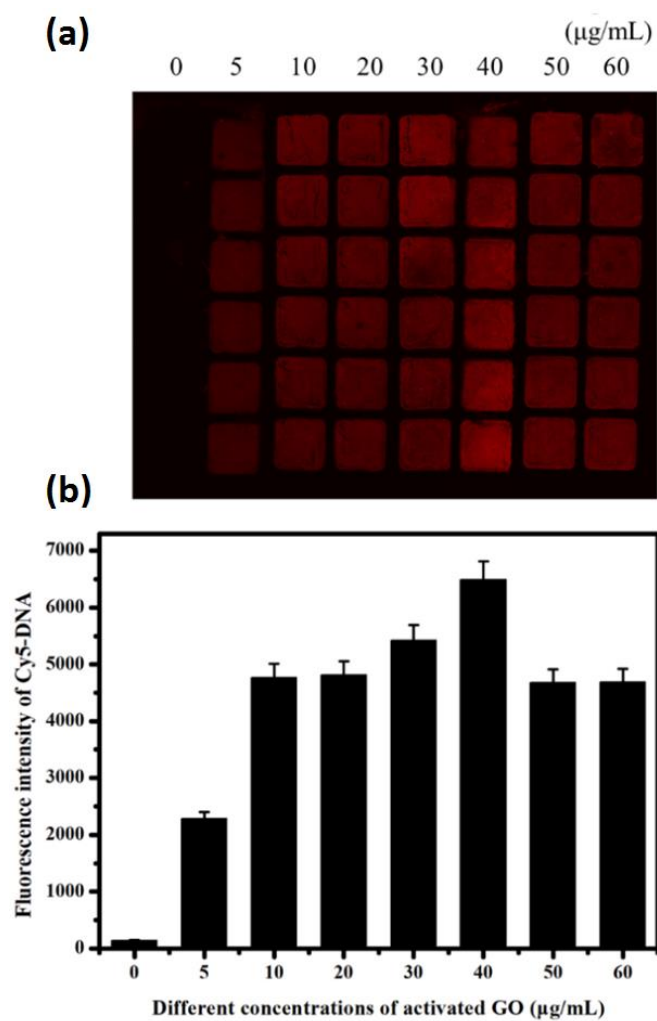

**Figure S4** Optimization of activated GO concentration based on sensors containing DNA sequences II hybrid with two PS cutting sites. **(a)** Scanning image of the chip microarray after optimization of activated GO concentration; **(b)** The fluorescence intensity of the Cy 5-DNA in the presence of different concentrations of activated GO.

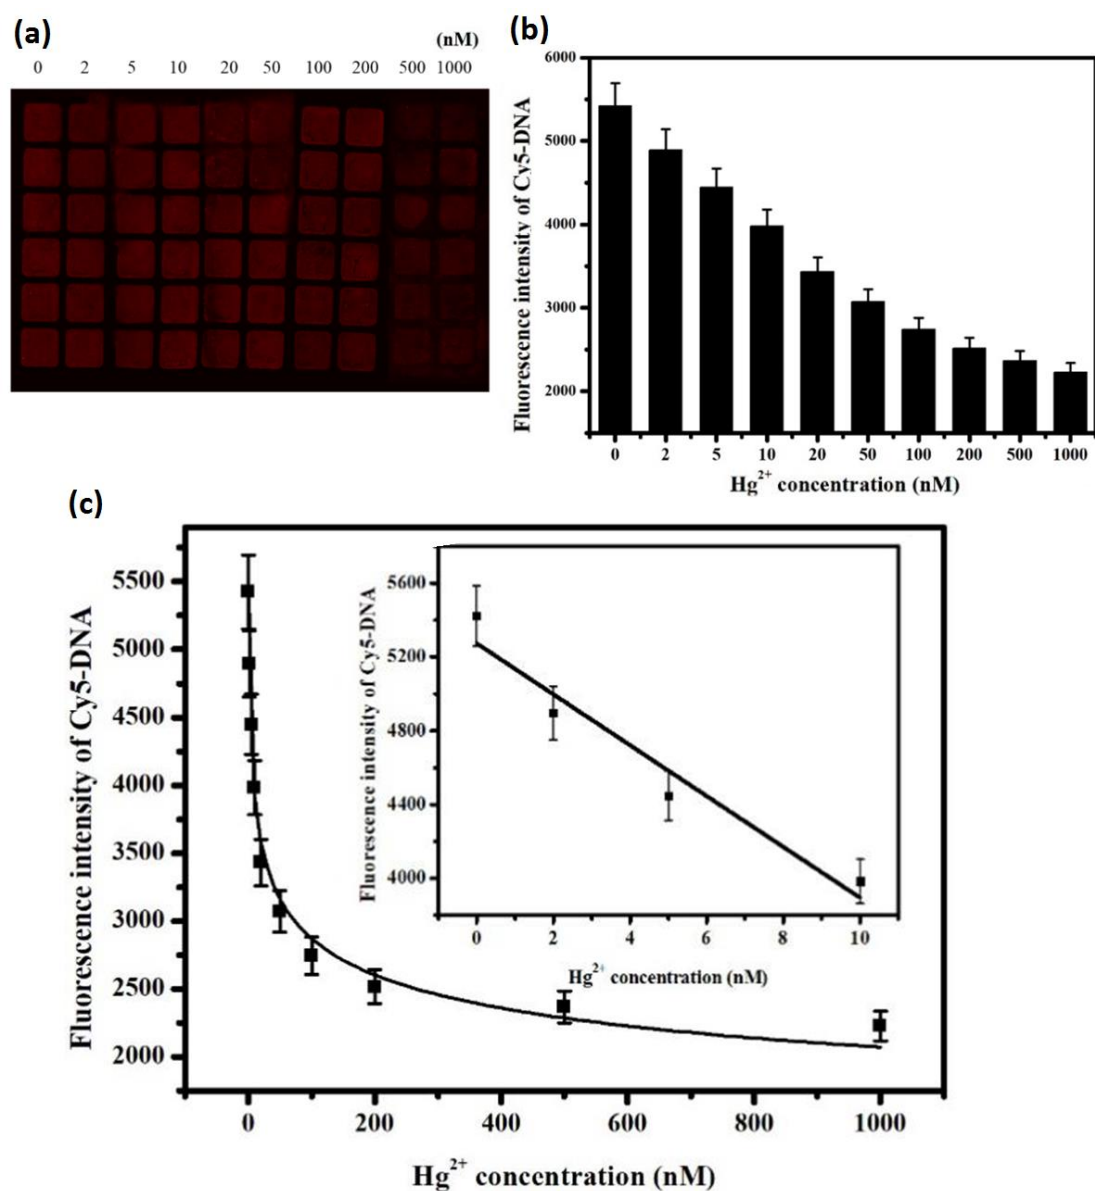

**Figure S5** Sensitivity analysis for  $\text{Hg}^{2+}$  detection based on sensors containing DNA sequences II hybrid with two PS cutting sites. (a) Scanning image of the chip array after adding different concentrations of  $\text{Hg}^{2+}$ ; (b) The fluorescence intensity of the Cy 5-DNA in the presence of different concentrations of  $\text{Hg}^{2+}$ ; (c) Plotted data extracted from (b). The inset shown in (c) represents the linear working curve with the average of repeated 3 experiments at low mercury ion concentrations.
